# 1 **Multi-centre, multi-vendor reproducibility of 7T QSM and $R_2^*$ in** 2 **the human brain: results from the UK7T study**

3 Catarina Rua<sup>a\*</sup>, William T Clarke<sup>b</sup>, Ian D Driver<sup>c</sup>, Olivier Mougin<sup>d</sup>, Andrew T. Morgan<sup>e</sup>, Stuart  
4 Clare<sup>b</sup>, Susan Francis<sup>d</sup>, Keith Muir<sup>e</sup>, David Porter<sup>e</sup>, Richard Wise<sup>c</sup>, Adrian Carpenter<sup>a</sup>, Guy  
5 Williams<sup>a</sup>, James B Rowe<sup>f,g</sup>, Richard Bowtell<sup>d</sup>, Christopher T Rodgers<sup>a</sup>

- 6  
7 a) Wolfson Brain Imaging Centre, Department of Clinical Neurosciences, University of  
8 Cambridge, Cambridge, United Kingdom.  
9 (The Wolfson Brain Imaging Centre, Box 65, Cambridge Biomedical Campus, Cambridge,  
10 UK, CB2 0QQ)
- 11 b) Wellcome Centre for Integrative Neuroimaging, FMRIB, Nuffield Department of Clinical  
12 Neurosciences, University of Oxford, Oxford, United Kingdom.  
13 (Wellcome Centre for Integrative Neuroimaging, FMRIB, Level 0, John Radcliffe Hospital,  
14 Oxford, United Kingdom, OX3 9DU)
- 15 c) Cardiff University Brain Research Imaging Centre, School of Psychology, Cardiff University,  
16 Cardiff, United Kingdom.  
17 (Cardiff University Brain Research Imaging Centre, Cardiff University, Maindy Road, Cardiff,  
18 CF24 4HQ)
- 19 d) Sir Peter Mansfield Imaging Centre, School of Physics and Astronomy, University of  
20 Nottingham, Nottingham, United Kingdom.  
21 (Sir Peter Mansfield Imaging Centre, University of Nottingham, University Park,  
22 Nottingham, NG7 2RD)
- 23 e) Imaging Centre of Excellence, University of Glasgow, Glasgow, United Kingdom  
24 (Imaging Centre of Excellence, Queen Elizabeth University Hospital, Langlands Dr, Glasgow,  
25 United Kingdom, G51 4LB)
- 26 f) Department of Clinical Neurosciences and Cambridge University Hospitals NHS Trust,  
27 University of Cambridge, Cambridge, United Kingdom  
28 (Department of Clinical Neurosciences, Herchel Smith Building, Cambridge Biomedical  
29 Campus, Cambridge CB2 0SZ)
- 30 g) Medical Research Council Cognition and Brain Sciences Unit, University of Cambridge,  
31 Cambridge, United Kingdom.  
32 (MRC Cognition and Brain Sciences Unit, University of Cambridge, 15 Chaucer Road,  
33 Cambridge, CB27EF)

34  
35  
36 \* To whom correspondence should be addressed  
37  
38  
39

## 40 Abstract

41 We present the reliability of ultra-high field  $T_2^*$  MRI at 7T, as part of the UK7T Network's  
42 "Travelling Heads" study.  $T_2^*$ -weighted MRI images can be processed to produce quantitative  
43 susceptibility maps (QSM) and  $R_2^*$  maps. These reflect iron and myelin concentrations, which  
44 are altered in many pathophysiological processes. The relaxation parameters of human brain  
45 tissue are such that  $R_2^*$  mapping and QSM show particularly strong gains in contrast-to-noise  
46 ratio at ultra-high field (7T) vs clinical field strengths (1.5 - 3T). We aimed to determine the  
47 inter-subject and inter-site reproducibility of QSM and  $R_2^*$  mapping at 7T, in readiness for  
48 future multi-site clinical studies.

49 Methods: Ten healthy volunteers were scanned with harmonised single- and multi-echo  $T_2^*$ -  
50 weighted gradient echo pulse sequences. Participants were scanned five times at each "home"  
51 site and once at each of four other sites. The five sites had 1x Philips, 2x Siemens Magnetom,  
52 and 2x Siemens Terra scanners. QSM and  $R_2^*$  maps were computed with the Multi-Scale  
53 Dipole Inversion (MSDI) algorithm (<https://github.com/fil-physics/Publication-Code>). Results  
54 were assessed in relevant subcortical and cortical regions of interest (ROIs) defined manually  
55 or by the MNI152 standard space.

56 Results and Discussion: Mean susceptibility ( $\chi$ ) and  $R_2^*$  values agreed broadly with literature  
57 values in all ROIs. The inter-site within-subject standard deviation was 0.001 – 0.005 ppm ( $\chi$ )  
58 and 0.0005 – 0.001  $\text{ms}^{-1}$  ( $R_2^*$ ). For  $\chi$  this is 21-95% better than 3T reports, and 15-124% better  
59 for  $R_2^*$ . The median ICC from within- and cross-site  $R_2^*$  data was 0.98 and 0.91, respectively.  
60 Multi-echo QSM had greater variability vs single-echo QSM especially in areas with large  $B_0$   
61 inhomogeneity such as the inferior frontal cortex. Across sites,  $R_2^*$  values were more  
62 consistent than QSM in subcortical structures due to differences in  $B_0$ -shimming. On a  
63 between-subject level, our measured  $\chi$  and  $R_2^*$  cross-site variance is comparable to within-site  
64 variance in the literature, suggesting that it is reasonable to pool data across sites using our  
65 harmonised protocol.

66 Conclusion: The harmonized UK7T protocol and pipeline delivers over a 2-fold improvement in  
67 the coefficient of reproducibility for QSM and  $R_2^*$  at 7T compared to previous reports of multi-  
68 site reproducibility at 3T. These protocols are ready for use in multi-site clinical studies at 7T.

69

## 70 Keywords

71 7 tesla; MRI; Quantitative Susceptibility Mapping;  $R_2^*$  mapping; Multi-centre;  
72 Reproducibility.

73

## 74 1. Introduction

75 Neurodegenerative diseases are a significant global health burden. In many instances,  
76 neurodegeneration is associated with the deposition of iron in the brain.  
77 Understanding the patterns of deposition and their association with other risk factors  
78 is a key area of clinical research, but progress has been limited by the need to scale  
79 over multi-centre trials.

80 A popular approach to estimating iron concentration in the human brain uses gradient-  
81 echo (GE) magnetic resonance imaging (MRI). In grey matter, iron is mainly found in  
82 the protein ferritin, where it exists in a paramagnetic state (Langkammer et al., 2012).  
83 This paramagnetic iron interacts with the MRI scanner's static magnetic field ( $B_0$ )  
84 causing local dipolar field perturbations. These accentuate the rate of transverse signal  
85 decay causing  $T_2^*$  relaxation in surrounding tissue, which is visible as decreasing signal  
86 amplitude with increasing echo time in a series of GE images. This effect causes an  
87 increase in the *rate* of transverse relaxation,  $R_2^*$ , which correlates well with non-heme  
88 iron concentrations in grey matter (Gelman et al., 1999; Langkammer et al., 2010), and  
89 has been used to investigate the distribution of iron in the healthy brain and in disease  
90 (Haacke et al., 2005; Yao et al., 2009; Li et al., 2019).

91 The local presence of iron (and to a lesser extent myelin and calcium) also affects the  
92 signal phase of GE images because of the effect of the field perturbation on the local  
93 Larmor frequency (House et al., 2007; He et al., 2009; Lee et al., 2012). Quantitative  
94 Susceptibility Mapping (QSM) methods attempt to deconvolve these dipole phase  
95 patterns to identify the sources of the magnetic field inhomogeneity. In other words,  
96 QSM estimates quantitative maps of tissue magnetic susceptibility  $\chi$  from GE phase  
97 data (Li and Leigh, 2004; Reichenbach, 2012; Wang and Liu, 2015). This approach has  
98 shown sensitivity to several neurological conditions (Lotfipour et al., 2012; Acosta-  
99 Cabronero et al., 2013; Blazejewska et al., 2015; Acosta-Cabronero et al., 2016) and  
100 offers advantages over magnitude  $R_2^*$  such as having reduced blooming artifacts or  
101 being able to distinguish between paramagnetic and diamagnetic substances (Eskreis-  
102 Winkler et al., 2017).

103  $R_2^*$  imaging and QSM have been shown to provide reproducible results in single-site  
104 and cross-site studies at 1.5T and 3T (Hinoda et al., 2015; Cobzas et al., 2015; Deh et  
105 al., 2015; Lin et al., 2015; Santin et al., 2017; Feng et al., 2018; Spincemaille et al.,  
106 2019).

107 The dipole-inversion problem at the heart of QSM methods benefits from the  
108 increased sensitivity to magnetic susceptibility variation and spatial resolution at ultra-  
109 high fields ( $B_0 \geq 7$  T) (Yacoub et al., 2001; Reichenbach et al., 2001; Tie-Qiang et al.,  
110 2006; Duyn et al., 2007; Wharton and Bowtel, 2010). At 7T, close attention must be  
111 paid to  $B_0$  shimming and gradient linearity to achieve accurate QSM and  $R_2^*$  mapping  
112 (Yang et al., 2010). Head position is also an important factor that affects the  
113 susceptibility anisotropy (Lancione et al., 2017; Li et al., 2017).

114 In this study, we introduce single-echo and multi-echo GE imaging protocols for QSM  
115 and  $R_2^*$  mapping at 7T which were standardised on three different 7T MRI scanner  
116 platforms, from two different vendors. We applied this standardised protocol in the  
117 UK7T Network's "Travelling Heads" study on 10 subjects scanned at 5 sites. We report  
118 reproducibility for derived  $R_2^*$  and QSM maps and make recommendations for the  
119 design of future multi-centre studies.

| # Site                                                                       | Vendor  | Scanner Model  | Gradient Performance                                             | Installation Date (Month-Year) | Software Version |
|------------------------------------------------------------------------------|---------|----------------|------------------------------------------------------------------|--------------------------------|------------------|
| 1 Wellcome Centre for Integrative Neuroimaging (FMRIB), University of Oxford | Siemens | Magnetom 7T    | 70 mT m <sup>-1</sup><br>200 mT m <sup>-1</sup> ms <sup>-1</sup> | Dec-2011                       | VB17A            |
| 2 Cardiff University Brain Research Imaging Centre, Cardiff University       | Siemens | Magnetom 7T    | 70 mT m <sup>-1</sup><br>200 mT m <sup>-1</sup> ms <sup>-1</sup> | Dec-2015                       | VB17A            |
| 3 Sir Peter Mansfield Imaging Centre, University of Nottingham               | Philips | Achieva 7T     | 40 mT m <sup>-1</sup><br>200 mT m <sup>-1</sup> ms <sup>-1</sup> | Sep-2005                       | R5.1.7.0         |
| 4 Wolfson Brain Imaging Centre, University of Cambridge                      | Siemens | Magnetom Terra | 80 mT m <sup>-1</sup><br>200 mT m <sup>-1</sup> ms <sup>-1</sup> | Dec-2016                       | VE11U            |
| 5 Imaging Centre of Excellence, University of Glasgow                        | Siemens | Magnetom Terra | 80 mT m <sup>-1</sup><br>200 mT m <sup>-1</sup> ms <sup>-1</sup> | Mar-2017                       | VE11U            |

120 **Table 1:** Details of the scanners and hardware used for the UK7T Network's Travelling  
121 Heads study.  
122

## 123 2. Methods

### 124 2.1. Measurement setup

125 Ten healthy volunteers (3 female, 7 male; age  $32.0 \pm 5.9$  years) were recruited:  
126 comprising two subjects from each of the five 7T imaging sites in the UK7T Network  
127 (described in Table 1). Each subject was scanned five times at their “home” site, and  
128 once at the other sites, under local ethics approval for multi-site studies obtained at  
129 Site-4 (HBREC.2017.08). Scans for each subject were completed within a period of  
130 between 83 and 258 days.

131 In every scan session,  $B_0$  shimming was performed using the vendors’ default second-  
132 order (or third-order for Site-4 and Site-5)  $B_0$ -shimming routines.  $B_1^+$ -calibration was  
133 performed initially using the vendor’s default adjustment scans. A 3D DREAM  
134 sequence (Nehrke et al., 2012; Ehses et al., 2019) was subsequently acquired and the  
135 transmit voltage (or power attenuation) was then adjusted for all subsequent imaging  
136 based on the mean flip-angle from the brain in an anatomically-specified axial slice of  
137 the 3D DREAM flip angle map as described in Clarke et al. (2019). Single-echo (SE)  
138 0.7mm isotropic resolution  $T_2^*$ -weighted GE data were then acquired with:  
139 TE/TR=20/31ms; FA=15°; bandwidth=70Hz/px; in-plane acceleration-factor=4 (Sites-  
140 1/2/4/5) or 2x2 (Site-3); FOV=224x224x157mm<sup>3</sup>; scan-time= $\sim$ 9min. Multi-echo (ME)  
141 1.4mm isotropic resolution  $T_2^*$ -weighted GE data were acquired with: TE<sub>1</sub>/TR=4/43ms;  
142 8 echoes with monopolar gradient readouts; echo-spacing=5ms; FA=15°;  
143 bandwidth=260Hz/px; acceleration-factor=4 (Sites-1/2/4/5) or 2x1.5 (Site-3);  
144 FOV=269x218x157mm<sup>3</sup>; scan-time  $\sim$ 6min (Sites-1/2/4/5) and  $\sim$ 4min (Site-3). For  
145 Siemens data, coil combination was performed using a custom implementation of  
146 Roemer’s algorithm, as previously described (Clarke et al., 2019). Subject 6’s SE scan  
147 failed to reconstruct using Roemer’s method on data from the 1<sup>st</sup> visit at Site-5 so a  
148 sum-of-squares (SoS) algorithm was used for coil combination for that scan instead. A  
149 0.7mm isotropic MP2RAGE scan was used for within- and cross-site registration as  
150 previously described (Mougin et al., 2019).

151

## 152 2.2. QSM and $R_2^*$ data processing

153 QSM maps were generated from both the SE and ME  $T_2^*$ -weighted datasets using the  
154 Multi-Scale Dipole Inversion (MSDI) algorithm, as implemented in QSMbox v2.0  
155 (Acosta-Cabronero et al., 2018). Briefly: first the local field was estimated by phase  
156 unwrapping (Abdul-Rahman et al., 2005) and weighted least squares phase echo fitting  
157 was performed on the ME data. Then, for both SE and ME data, background field was  
158 removed using the Laplacian Boundary Value (LBV) method followed by the variable  
159 Spherical Mean Value (vSMV) algorithm with an initial kernel radius of 40mm (Zhou et  
160 al., 2014; Acosta-Cabronero et al., 2018). MSDI inversion was estimated with two  
161 scales: the self-optimised lambda method was used on the first scale with filtering  
162 performed using a kernel with 1mm radius, and on the second scale the regularization  
163 term was set to  $\lambda=10^{2.7}$  (the optimal value for *in-vivo* 7T datasets found in (Acosta-  
164 Cabronero et al., 2018)) and filtering was done with a kernel radius set to 5mm. Brain  
165 masks used in the analysis were obtained with FSL's Brain Extraction Tool (BET) with  
166 fractional intensity threshold=0.2 for SE data (Smith, 2002). These were then mapped  
167 to ME data space.

168 On the ME data, QSM was reconstructed seven more times: with the shortest echo  
169 ( $TE_1=4$  ms), with the two shortest echoes (i.e.  $TE_1/TE_2 = 4/9$  ms), with the three  
170 shortest echoes (i.e.  $TE_1/TE_2/TE_3 = 4/9/14$  ms), and so forth.

171 On the ME dataset, voxel-wise quantitative maps of  $R_2^*$  were obtained using the Auto-  
172 Regression on Linear Operations (ARLO) algorithm for fast monoexponential fitting (Pei  
173 et al., 2015).

174

## 175 2.3. Data Registration

176 The neck was cropped from the magnitude data with FSL's "robustfov" command  
177 (<https://fsl.fmrib.ox.ac.uk/fsl/>), applied to the SE data and the 4<sup>th</sup> echo of the ME data.  
178 High-resolution SE and ME templates were made from this cropped data for each  
179 subject with `antsMultivariateTemplateConstruction2.sh` from the Advanced  
180 Normalization Tools (ANTs, <http://stnava.github.io/ANTs/>). Two approaches were  
181 compared: transformations using rigid registration with mutual information similarity  
182 metric (denoted as "Rigid" below) or using symmetric diffeomorphic image registration

183 with cross-correlation similarity metric (denoted “SyN” below). Other settings were  
184 kept the same for both approaches: 4 steps with 0.1 gradient step size, maximum  
185 iterations per step 1000, 500, 250 and 100, smoothing factors per step of 4, 3, 2, and 1  
186 voxels, and shrink factors per step of 12x, 8x, 4x, and 2x. The resulting registrations  
187 were then applied to the QSM and  $R_2^*$  maps which were averaged to create SE and ME  
188 QSM and  $R_2^*$  templates for each subject.

189

#### 190 2.4. Selection of Regions of Interest (ROIs)

191 Five regions of interest (Substantia Nigra, Red Nucleus, Caudate Nucleus, Putamen and  
192 Globus Pallidus) were manually segmented based on the subject-specific QSM  
193 templates of the SE data registered with the “SyN” approach. In order to minimize the  
194 amount of segmentation variability, these ROIs were then mapped to the SE “Rigid”,  
195 and ME “SyN” and ME “Rigid” spaces with nearest neighbour interpolation and via  
196 non-linear registrations obtained with the default settings in the  
197 `antsRegistrationSyN.sh` command in ANTs.

198

199 Magnitude data were first registered to the  $T_1$ -weighted MP2RAGE scans (Rigid  
200 transformations; MI similarity metric) and later to the standard  $T_1$  “MNI152 brain”  
201 (Montreal Neurological Institute 152) (using settings in `antsRegistrationSyN.sh`) applied  
202 to the SE data and to the 1<sup>st</sup> echo of the ME data. These registrations were then used  
203 to map the 48 probabilistic cortical ROIs, “cortical ROIs”, from the Harvard-Oxford  
204 Cortical Atlas and the 21 probabilistic subcortical ROIs, “subcortical ROIs”, from the  
205 Harvard Oxford Subcortical Atlas to the QSM and  $R_2^*$  template spaces.

206 The  $T_1$ -weighted MP2RAGE data was bias-field corrected, brain extracted, and  
207 segmented into five tissues using SPM (<https://www.fil.ion.ucl.ac.uk/spm/>): the grey  
208 matter (GM), white matter (WM) and cerebral-spinal fluid (CSF) volumes were mapped  
209 into each subject-specific QSM template space. Then, using “fslmaths” from FSL  
210 (<https://fsl.fmrib.ox.ac.uk/fsl/>), the mapped cortical ROIs were thresholded at 10% of  
211 the “robust range” of non-zero voxels and multiplied by the GM tissue map in order to  
212 obtain GM-specific cortical ROIs. The mapped subcortical ROIs were thresholded at  
213 50% of the “robust range” of non-zero voxels. From these, any CSF voxels were

214 excluded from the left and right Caudate Nucleus, Putamen and Globus Pallidus, and  
215 the voxel sets from the left and right counterparts were merged together.

216 From the SE and ME data, average  $\chi$  and  $R_2^*$  values were extracted from the manual  
217 and Atlas-based ROIs for all volunteers and sessions in template space (values given in  
218 Supplementary Material 1).

219 In order to estimate where the magnetic field is spatially more variable, field-maps  
220 were first estimated from the ME datasets.  $\Delta B_0$  was then calculated per-voxel as the  
221 average difference between the field in a voxel and its immediate nearest neighbors.  
222 The average  $\Delta B_0$  was extracted for each of the cortical ROIs and averaged across all  
223 subjects and sessions. Then the cortical ROIs were divided into two groups based on  
224 the  $\Delta B_0$  values: wherever  $|\Delta B_0| > 0.005 \text{ Hz}$  the ROI was grouped into “high  $\Delta B_0$ ”  
225 regions, otherwise it was grouped into “low  $\Delta B_0$ ” regions.

226 We explored three possible susceptibility reference regions for QSM processing. The  
227 average QSM signal was extracted from:

- 228 1. A whole brain mask, “wb”;
- 229 2. A whole-brain CSF mask eroded in two steps, “csf”;
- 230 3. A manually placed cylindrical ROI in the right ventricle, “cyl” (across all subjects  
231 the ROI volume was  $104 \pm 11 \text{ mm}^3$ ).

232

## 233 2.5. Statistical Analysis

234 Statistical analysis was performed with R 3.5.3 (R Core Team, 2013). Cross-site analysis  
235 used only the 1<sup>st</sup> scan at the “home” site along with the scans at the other four sites.  
236 To obtain the within subject average,  $AV_w$ , the  $\chi$  and  $R_2^*$  values were averaged within  
237 the same site and across the sites and then averaged across subjects:

$$AV_w = \frac{\sum_{i=1}^m (\sum_{j=1}^n x_{ij} / n)}{m} \quad [1]$$

238 where  $n$  is the number of sessions ( $n = 5$  for within-site and cross-site) and  $m$  the  
239 number of subjects. Relative reliability was measured using the intra-class correlation  
240 coefficient (ICC) from within and cross-site data independently for each ROI (Weir,  
241 2005):

$$ICC = \frac{MS_b - MS_w}{MS_b + MS_w(n - 1)} \quad [2]$$



242 where  $MS_b$  and  $MS_w$  are the between-subjects and within-subjects mean square from  
243 a random-effects, one-way analysis of variance (ANOVA) model. Intra-subject absolute  
244 variability is assessed by measuring the within-subject standard-deviation ( $SD_w$ )  
245 calculated as (Santin et al., 2017):

$$246 \quad SD_w = \sqrt{\frac{\sum_{i=1}^m \sigma_i^2}{m}} \quad \text{with } \sigma_i = \sqrt{\frac{\sum_{j=1}^n (x_{ij} - \bar{x}_i)^2}{n-1}} \quad [3]$$

247 where  $\bar{x}_i = \sum_{j=1}^n x_{ij}/n$  is the replicate average for each subject.  $SD_w$  was computed  
248 using within-site data and cross-site data independently. Similarly, cross-subject  
249 variability was calculated by measuring the between-subject standard-deviation ( $SD_b$ ):

$$SD_b = \sqrt{\frac{\sum_{i=1}^m \sum_{j=1}^n (x_{ij} - x_{avg})^2}{n \times m - 1}} \quad [4]$$

250 where  $x_{avg} = \sum_{i=1}^m \sum_{j=1}^n x_{ij} / (n \times m)$  is the measurement average across subjects and  
251 sessions. Note that  $SD_b$  is computed using data from all sites.

252 Statistical testing on  $AV_w$ ,  $SD_w$  and ICC values extracted from manual and template-  
253 based ROIs was done by first fitting the data with normal, log-normal, gamma and  
254 logistic distributions. The goodness-of-fit statistics for the parametric distributions  
255 were calculated and the distribution which showed the lowest Akaike's Information  
256 Criterion was then used on a general linear model fitting. All models included as fixed  
257 main effects ROI number and data type (within- and cross-site). When evaluating the  
258 data registration type, the model also included registration type ("Rigid" and "SyN") as  
259 a fixed main effect. When testing for QSM reference, the model also included  
260 reference region ("wb", "csf", and "cyl") as a fixed main effect. On ME QSM data, a  
261 model was fitted which also included the number of echoes processed as a fixed main  
262 effect. When comparing the manual and subcortical ROIs, the ROI type (manual vs.  
263 atlas-based) was also included as a fixed main effect. Finally, on the data from the  
264 cortical ROIs, ROI number was replaced with "high  $\Delta B_0$ " and "low  $\Delta B_0$ " ROI type as  
265 covariate. A p-value less than 0.05 was considered significant.

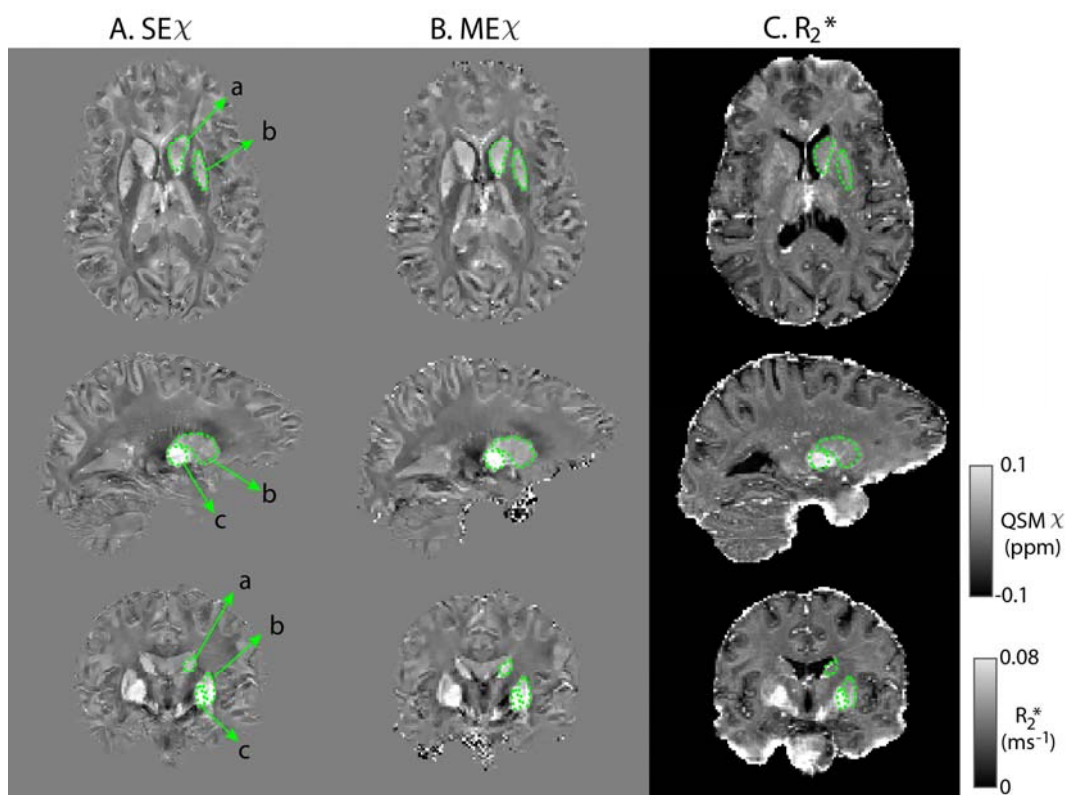

266  
267 **Figure 1:** Representative slices of SE  $\chi$  (A) ME  $\chi$  (B) and  $R_2^*$  maps (C) from an example  
268 subject. The right Caudate Nucleus (a), Putamen (b) and Globus Pallidus (c) are shown  
269 in green.  
270

### 271 3. Results

272 Figure 1 shows QSM and  $R_2^*$  maps for one example subject. Basal ganglia structures,  
273 including Caudate Nucleus, Putamen and Globus Pallidus are clearly visible consistent  
274 with previous findings (Langkammer et al., 2010; Wang et al., 2015; Betts et al., 2016;  
275 Acosta-Cabronero et al., 2016). Supplementary Material 2 Figure 1 highlights the  
276 difference in QSM data quality when using our chosen Roemer coil combination  
277 method vs using sum-of-squares coil combination.  
278

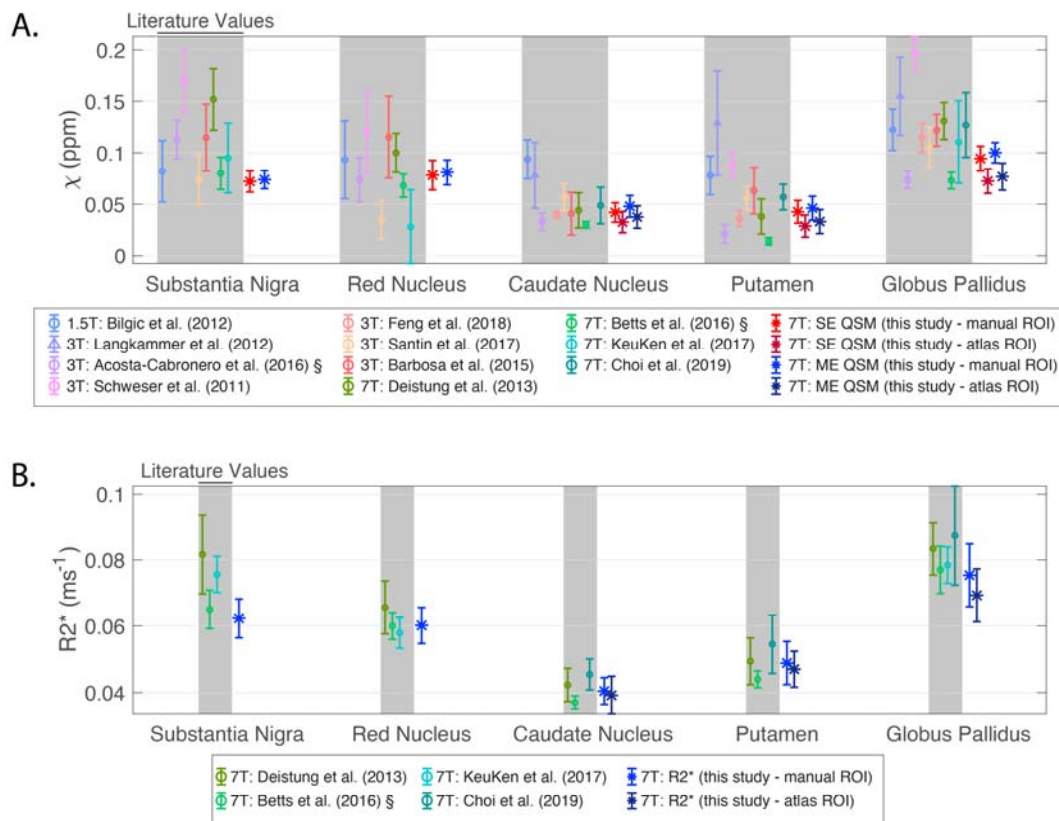

279

280 **Figure 2:** Mean and standard deviation literature values of QSM (A) and  $R_2^*$  (B). The  
 281 mean and standard deviation results from this study are also plotted. For data with the  
 282 symbol '§' the standard error of the mean was originally reported and has been  
 283 rescaled by reported N. Shaded regions correspond to literature data.  
 284

### 285 3.1. QSM and $R_2^*$ results and literature

286 Figure 2 compares average  $\chi$  and  $R_2^*$  values calculated in this study in the five manual  
 287 ROIs and three corresponding atlas-based subcortical ROIs against literature ranges.  
 288 The SE  $\chi$ -values and ME  $\chi$ -values from this study are consistent with literature values at  
 289 1.5T, 3T and 7T.  $R_2^*$  values from this study also agree closely with 7T literature values.

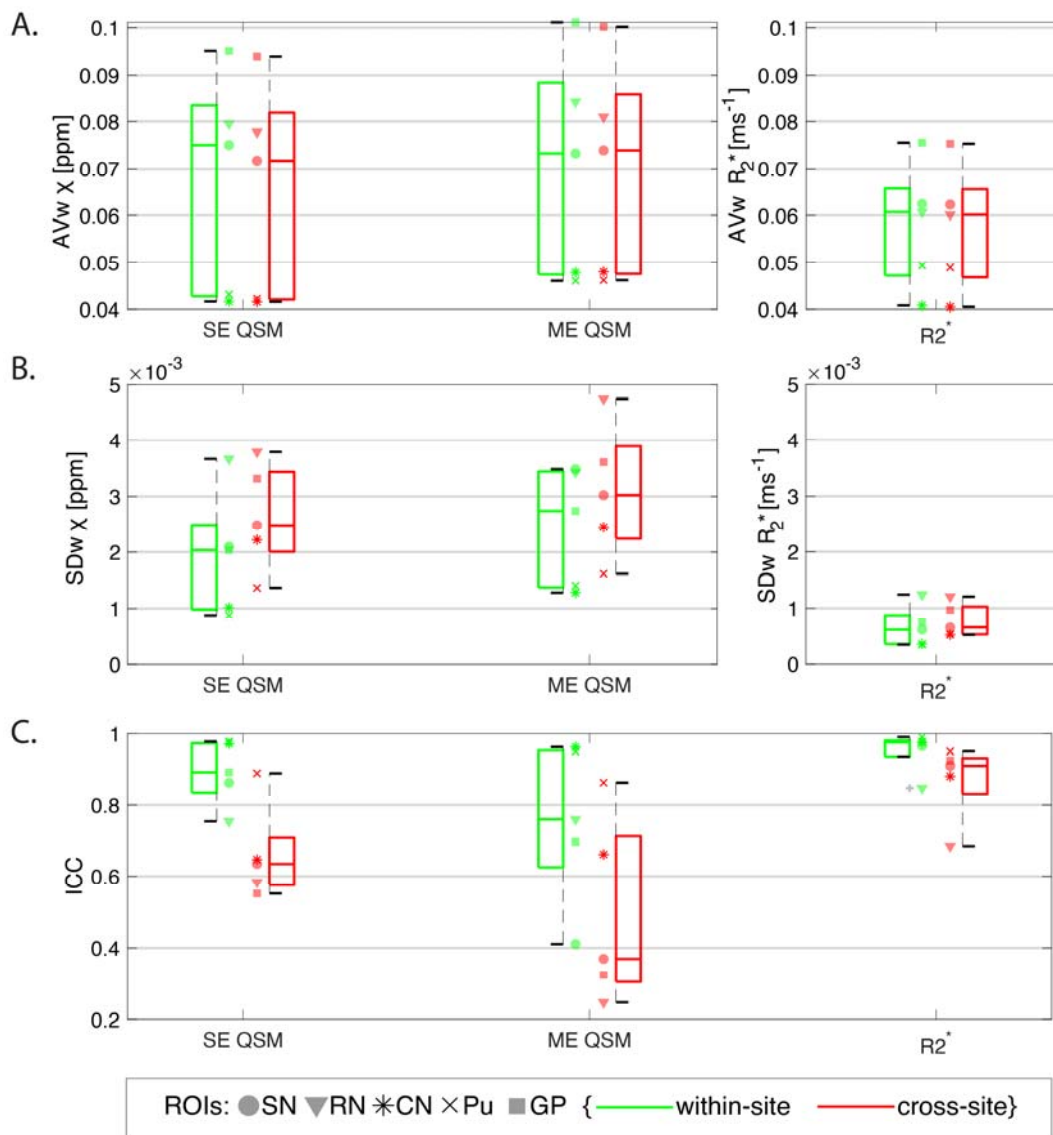

290  
291  
292  
293  
294  
295

**Figure 3.** Boxplots from data obtained on the manual ROIs of within- and cross-site AV<sub>w</sub> (A), SD<sub>w</sub> (B) and ICC (C) of SE and ME QSM, and R<sub>2</sub><sup>\*</sup>. Data from each ROI is shown with a different marker for each boxplot. Legend: SN=Substantia Nigra; RN: Red Nucleus; CN: Caudate Nucleus; Pu: Putamen; GP: Globus Pallidus.

### 296 3.2. Reproducibility of QSM and R<sub>2</sub><sup>\*</sup>

297 Figure 3 shows boxplots over ROIs of the within- and cross-site AV<sub>w</sub> (A), SD<sub>w</sub> (B) and ICC  
298 (C) values for the manual ROIs on the  $\chi$  and R<sub>2</sub><sup>\*</sup> maps. The AV<sub>w</sub> from R<sub>2</sub><sup>\*</sup> maps  
299 measured on the same site is systematically higher compared to the AV<sub>w</sub> measured  
300 across sites ( $p < 0.0001$ ; e.g., on the Putamen ROI, AV<sub>w\_within-site</sub> = 0.0493 ms<sup>-1</sup> vs  
301 AV<sub>w\_cross-site</sub> = 0.0489 ms<sup>-1</sup>). On this comparison, QSM data did not show significant

302 differences between within-site and cross-site groups for either SE data ( $p = 0.053$ ) or  
303 ME data ( $p = 0.65$ ).

304 From all the data in the manual ROIs, the median  $SD_w$  of SE  $\chi$ -values was approximately  
305 29% lower than for ME  $\chi$ -values ( $p = 0.0010$ ). There was a significantly larger  $SD_w$  cross-  
306 site compared to within-site on SE  $\chi$  data ( $p < 0.0001$ ; e.g., on the PN ROI,  $SD_{w\_within-site} =$   
307  $0.00088$  ppm vs  $SD_{w\_cross-site} = 0.0014$  ppm), ME  $\chi$  ( $p = 0.033$ ) and on  $R_2^*$  data ( $p <$   
308  $0.0001$ ).

309 The ICC values for within- and cross-site  $R_2^*$  data (median ICC was 0.98 and 0.91,  
310 respectively) were found to be significantly higher than values for SE  $\chi$  (median ICC was  
311 0.89 and 0.64, respectively) or for ME  $\chi$  (median was ICC 0.76 and 0.38, respectively) ( $p$   
312  $= 0.00011$ ). For all measurements, the ICC for cross-site data was significantly lower  
313 than for within-site data (SE QSM:  $p < 0.0001$ ; ME QSM:  $p = 0.017$ ;  $R_2^*$ :  $p < 0.0001$ ).

314 Similar statistics were obtained for  $AV_w$ ,  $SD_w$  and ICC measurements in the atlas-based  
315 cortical ROIs (Table 2, Supplementary Material 2).

316

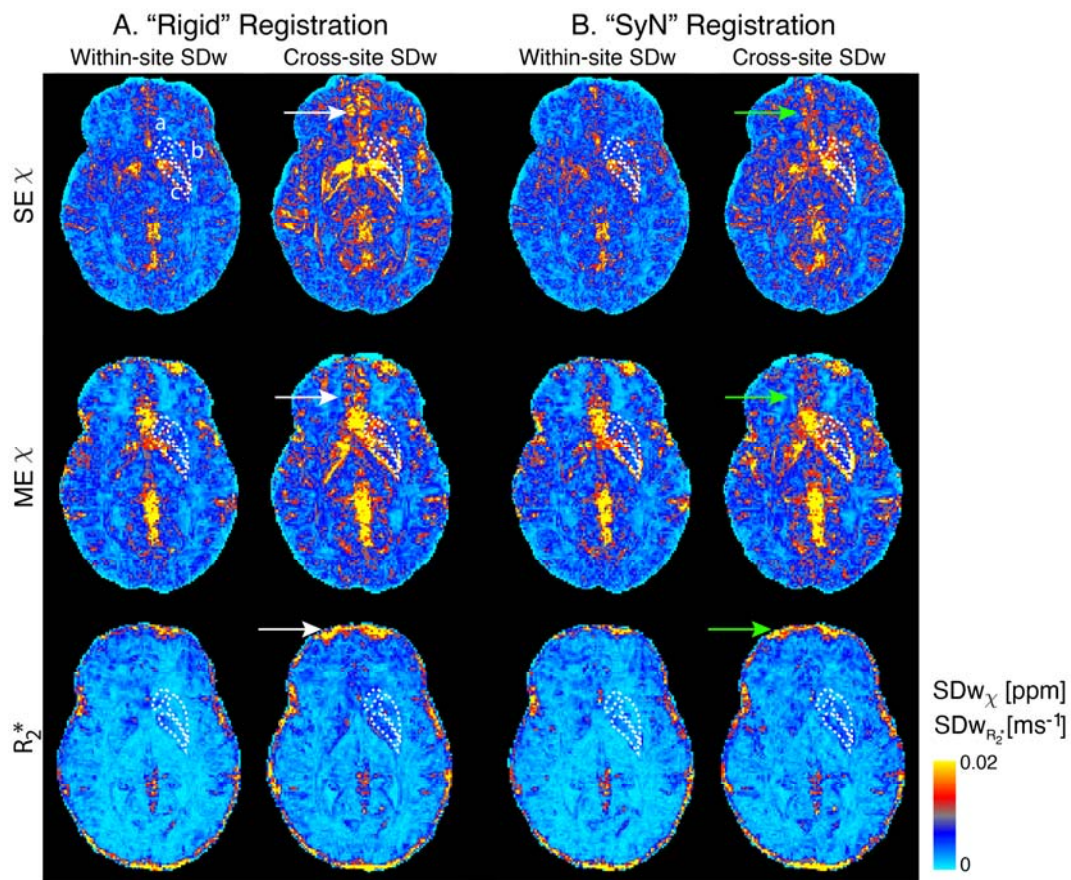

317

318 **Figure 4.** Voxel-wise within- and cross-site standard deviation of an example subject  
 319 from SE and ME QSM and  $R_2^*$  data with data registered with “Rigid” (A) and “SyN” (B)  
 320 transformations. Arrows point to regions where the  $SD_w$  decreased with the “SyN”  
 321 transformations (green) are compared to “Rigid” (white). The right Caudate Nucleus  
 322 (a), Putamen (b) and Globus Pallidus (c) are outlined in white.  
 323

### 324 3.3 Registration

325 The within- and cross-site standard deviations for one axial slice from one example  
 326 subject using “Rigid” and “SyN” registration approaches are shown in Figure 4.  
 327 Generally, with both registration methods, within-site and cross-site  $SD_w$  increases in  
 328 veins, in the orbitofrontal regions and at the cortical surface (white and green arrows,  
 329 Figure 4). These are areas associated with large  $B_0$  inhomogeneities and gradient non-  
 330 linearity. However, there is a decrease in the cross-site standard deviation in the  
 331 orbitofrontal region and close to the edges of the cortex when using the “SyN”  
 332 compared to the “Rigid” method (green arrows, Figure 4).

333 On the manual ROIs increased variability was observed for  $R_2^*$  on “Rigid” registered  
 334 data compared to “SyN” ( $SD_w$ :  $p < 0.0001$ ; ICC:  $p < 0.013$ ) but not for SE or ME  $\chi$ : for  
 335 example, the median cross-site  $R_2^*$   $SD_w$  from all ROIs was  $0.00066 \text{ ms}^{-1}$  using “SyN”  
 336 method and  $0.00086 \text{ ms}^{-1}$  using the “Rigid” registration method. On the atlas-based  
 337 cortical ROIs, the same significant trend was observed for  $R_2^*$  and SE  $\chi$  data (Table 2,  
 338 Supplementary Material 2).

339

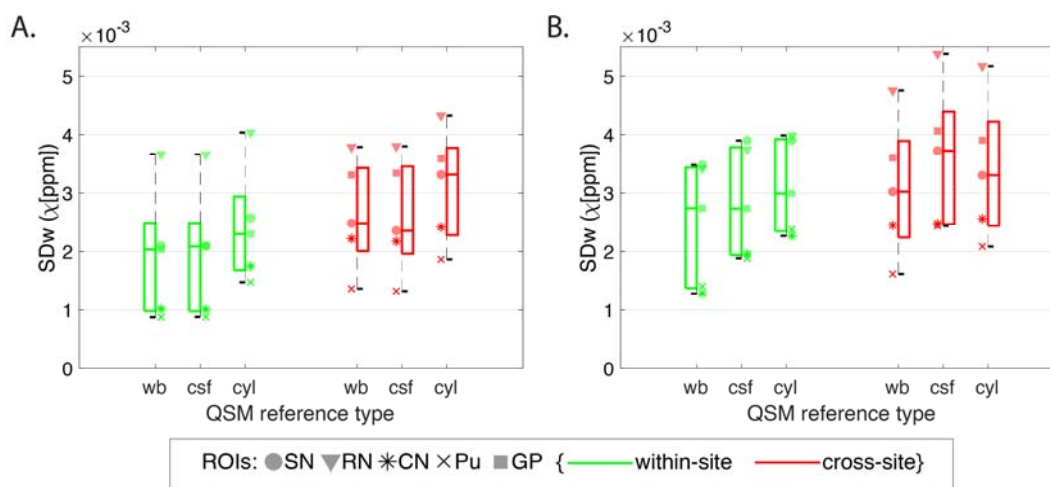

340

341 **Figure 5:** Boxplots from data obtained on the manual ROIs of within- and cross-site  $SD_w$   
 342 (red and green, respectively) of SE QSM (A) and ME QSM (B) with a whole-brain  
 343 reference (wb), with a csf reference (csf), and with a cylinder reference (cyl). Data from



344 each ROI is shown with a different marker for each boxplot. Legend: SN=Substantia  
345 Nigra; RN: Red Nucleus; CN: Caudate Nucleus; Pu: Putamen; GP: Globus Pallidus.  
346

### 347 3.4 QSM referencing

348 To assess the optimal QSM susceptibility referencing, Figure 5 shows boxplots of the  
349  $SD_w$  for SE and ME  $\chi$  using different referencing methods on the manual ROIs. On SE  $\chi$   
350 data, compared to “wb” correction (chosen correction for this study), the “csf”  
351 reference did not increase significantly the  $SD_w$  ( $p = 0.93$ ) but with “cyl” the median  
352  $SD_w$  increased by approximately 14% ( $p < 0.0001$ ).

353 ME  $\chi$  data showed an increase in the median  $SD_w$  of, respectively, 11% ( $p = 0.00096$ )  
354 and 8% ( $p = 0.00064$ ) when using “csf” and “cyl” methods for correction. The effect of  
355 varying the referencing of QSM data was similar in within-site and cross-site data, for  
356 all methods tested.

357

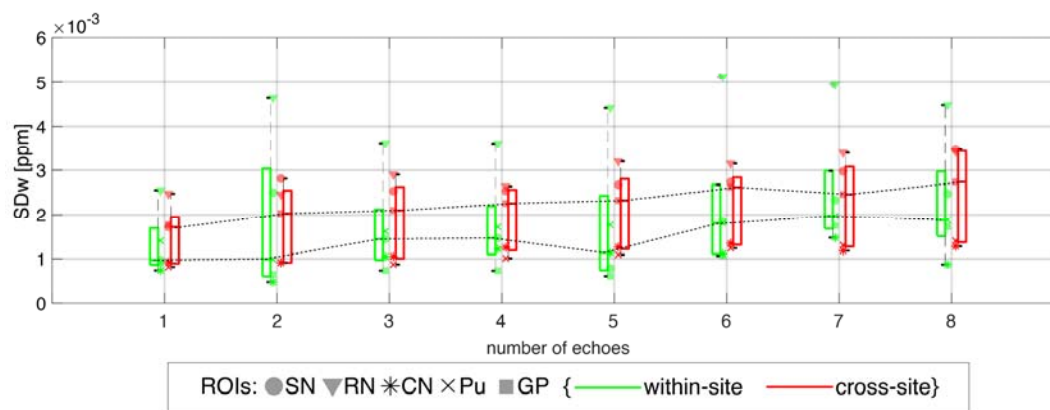

358 **Figure 6.** Boxplots from data obtained on the manual ROIs of within- and cross-site  $SD_w$   
359 for ME QSM calculated with different number of echoes. Increasing trend on the  
360 median  $SD_w$  observed with increasing number of echoes (dotted lines). Legend:  
361 SN=Substantia Nigra; RN: Red Nucleus; CN: Caudate Nucleus; Pu: Putamen; GP: Globus  
362 Pallidus.  
363

364

### 365 3.5 ME QSM

366 On average across all the manual ROIs and compared to single echo data, multi-echo  
367 data (using two or more echoes) showed a significant 14% increase of the  $SD_w$  (Figure  
368 6) and 3% of the ICC (Table 1, Supplementary Material 2). This supports the SE and ME  
369  $\chi$  comparison in Section 3.2. Similar behaviour was observed on the atlas-based  
370 cortical ROIs (Table 2, Supplementary Material 2). In the atlas-based cortical ROIs, long

371 echo times (i.e. using 6 or more echoes) showed an average increase of 15.7% in  $SD_w$  ( $p$   
372  $< 0.0001$ ) compared to using 2 to 5 echoes and a decrease of 1.75% in ICC ( $p < 0.0001$ )  
373 (Table 2, Supplementary Material 2).

#### 374 3.6 ROI selection

375 There is a small but significant higher average  $\chi$  from manually drawn ROIs compared  
376 to the atlas-based subcortical ROIs in SE QSM data ( $p < 0.0001$ ; e.g.  $0.042 \pm 0.009$  ppm  
377 vs  $0.033 \pm 0.010$  ppm in the caudate nucleus) and in ME QSM data ( $p < 0.0001$ ; e.g.  
378  $0.048 \pm 0.010$  ppm vs  $0.038 \pm 0.011$  ppm in the caudate nucleus) (Figure 2). Similarly, for  
379  $R_2^*$  (e.g.  $0.041 \pm 0.004$   $ms^{-1}$  vs  $0.039 \pm 0.006$   $ms^{-1}$  in the caudate nucleus) this difference  
380 was significant ( $p < 0.0001$ ). In addition, the  $SD_w$  was, on average, approximately two  
381 times higher and the ICC lower in the atlas-based subcortical ROIs compared to the  
382 manual ROIs in all datasets ( $SD_w$ : SE QSM  $p < 0.0001$ , ME QSM  $p < 0.0001$ ,  $R_2^*$   $p <$   
383  $0.0001$ ; ICC: SE QSM  $p = 0.00021$ , ME QSM  $p = 0.0023$ ,  $R_2^*$   $p = 0.012$ ). So, ROI selection  
384 should be done consistently in a study.

385

#### 386 3.7 Spatial distribution of the magnetic field

387 On the atlas-based cortical ROIs the  $SD_w$  increased by approximately 28% and 88% on  
388 “high  $\Delta B_0$ ” regions compared to “low  $\Delta B_0$ ” regions on ME  $\chi$  and  $R_2^*$  data, respectively  
389 ( $p = 0.0011$  and  $p < 0.0001$ ) (Table 2, Supplementary Material 2). Similarly, ICC values  
390 decreased significantly for SE and ME  $\chi$  and  $R_2^*$  values.

391

## 392 4. Discussion

393 In this paper, the reproducibility of QSM  $\chi$  and  $R_2^*$  measurements in cortical and  
394 subcortical regions of the brain was assessed for the first time in a multi-site study at  
395 7T for two different protocols (a single-echo 0.7mm isotropic  $T_2^*$ -weighted scan and a  
396 1.5mm isotropic multi-echo  $T_2^*$ -weighted scan), using three different scanner  
397 platforms provided by two different vendors.

398 Previous studies at 1.5T and 3T have shown good reproducibility for  $\chi$  and  $R_2^*$  data  
399 acquired on the same scanner or across sites (1.5T and 3T) (Hinoda et al., 2015; Cobzas  
400 et al., 2015; Deh et al., 2015; Lin et al., 2015; Santin et al., 2017; Feng et al., 2018;



401 Spincemaille et al., 2019). In terms of QSM and depending on the subcortical region,  
402 intra-scanner 3T repeatability studies report an  $SD_w$  of 0.002-0.005 ppm (Feng et al.,  
403 2018) and 0.004-0.006 ppm (Santin et al., 2017), and the cross-site 3T study by Lin et  
404 al. (2015) reported an average  $SD_w$  of 0.006-0.010 ppm. We observed a within-site  $SD_w$   
405 range of 0.0009-0.004 ppm and cross-site  $SD_w$  range of 0.001-0.005 ppm at 7T. The  
406 latter is therefore 21-95% better than within sites studies at 3T.

407 The range of within-site  $SD_w$  values for  $R_2^*$  was averaged 0.0003-0.001  $ms^{-1}$  in our  
408 study and the cross-site  $SD_w$  range was 0.0005-0.001  $ms^{-1}$ . The cross-site values are  
409 comparable to the *same site* reported at 3T: 0.0005-0.0009  $ms^{-1}$  (Feng et al., 2018),  
410 0.0006-0.002  $ms^{-1}$  (Santin et al., 2017). Compared to the latter, our cross-site results  
411 show a reduction of 15-124% in  $R_2^*$  variability.

412 The higher values of cross-site  $SD_w$  compared to the within-site values in our study may  
413 be attributed to the different gradient systems and automatic distortion corrections  
414 used in the different scanner platforms and to the different approaches to shimming,  
415 which lead to different geometrical distortions and dropout regions (Yang et al., 2010).  
416 We showed that the use of a non-linear registration method (here, "SyN" in ANTs)  
417 significantly reduced the inter-scanner variability of cortical QSM compared to rigid-  
418 body registration, indicating that differences in geometric distortion across scanners  
419 were present. The  $R_2^*$  results for both cortical and subcortical structures also show  
420 significantly lower inter-scanner variability when a non-linear registration was used.

421 In this study, the reproducibility of QSM using single-echo (SE), high-resolution (0.7  
422 mm isotropic resolution; TE=20ms) and multi-echo standard-resolution (ME) standard-  
423 resolution (1.4 mm isotropic resolution; TE=4, 9, 14, 19, 24, 29, 34 and 39 ms)  
424 protocols were compared, and the results show that the ME QSM data has a  
425 significantly higher variability than SE QSM. Although ME QSM data has been  
426 combined with a magnitude-weighted least squares regression of phase to echo time,  
427 it may carry incorrect phase from late echoes of the echo train that suffered multiple  
428 phase wraps. This has also been verified with an analysis on multi-echo QSM data  
429 reconstructed with different numbers of echoes: long echo times increase significantly  
430 the test-retest variability.

431  $R_2^*$  values show significantly lower variability, reflected in the higher ICC within and  
432 across-sites compared to corresponding values for  $\chi$  in subcortical areas. This may be  
433 because the  $\chi$  estimation is globally more sensitive to background field inhomogeneity  
434 compared to magnitude data. However, in orbitofrontal and lower temporal regions  
435 large through-plane field variations from tissue-air interfaces dominate the field  
436 changes and produce dropouts in the signal magnitude and increase the background  
437 phase, affecting both QSM and  $R_2^*$  maps by increasing variability and decreasing ICC.

438 QSM can only determine relative susceptibility differences (Cheng et al., 2009) and  
439 most approaches to calculation of susceptibility from measured phase yield maps in  
440 which the average value of susceptibility is zero over the masked imaging volume.  
441 Issues related to referencing of QSM data have been investigated (Feng et al., 2018;  
442 Straub et al., 2017), with aim of finding a reference region or tissue to which all  
443 susceptibility values are referred that produces well-defined and reproducible values  
444 of susceptibility. Here we investigated how the choice of reference affects the within-  
445 site and cross-site variability of measured susceptibility at ultra-high-field. We tested  
446 three accepted reference regions: total whole brain signal, “wb”, whole brain CSF  
447 eroded in order to exclude any pial or skull surfaces, “csf”, and a manually selected  
448 cylindrical ROI in the right ventricle, “cyl”. We found that the “cyl” referencing  
449 generally increased the variability of the cross-site and within-site susceptibility  
450 measurements in cortical and subcortical ROIs compared to “wb” referencing. In the  
451 case of ME acquisition the “csf” referencing also increased the variability relative to  
452 “wb” data. This may be because of imprecision in systematically obtaining average  
453 QSM signal from CSF regions. Referencing using a small ROI in the ventricles might be  
454 prone to subjectivity given the natural variation in ventricle size in healthy subjects and  
455 in disease. Furthermore, the ventricles do not contain pure CSF: they are traversed by  
456 blood vessels with a different  $\chi$  (Sullivan et al., 2002). This makes whole-brain  
457 referencing attractive in many situations. Yet, in patient cohorts where there is  
458 substantial iron load in subcortical structures (Snyder and Connor, 2009), whole brain  
459 referencing might not be an appropriate approach. In this case, the more appropriate  
460 approach will be to choose a small reference region which shows no changes in the  
461 particular disease to be “zero” susceptibility at a cost of a slight increase in SD.

462

463 To eliminate operator-dependent bias in segmentation when determining brain  
464 structures, we have analysed data using both manual and atlas-based segmentation.  
465 From our results, manual ROIs showed significantly lower variability compared to atlas-  
466 based methods. This happens because of imprecision in registration between MNI and  
467 subject space as well as the empirical thresholding that was chosen to obtain the  
468 subcortical ROIs. However, traditional manual drawing of ROIs for cohort studies is  
469 difficult, time consuming and potentially unsuitable as it biases results towards  
470 particular cohorts (Collins et al., 2003) so it may not always be the most appropriate  
471 approach.

472

473 In this study, harmonized protocols were produced for all five scanners without any  
474 significant sequence alterations, as a product 3D gradient echo (GE) sequence was  
475 readily available on all systems (the product 'gre' sequence from Siemens and the  
476 product 'ffe' from Philips). The protocols and an example dataset are provided in  
477 (Clarke, 2018). Generally, we also relied on the vendors' reconstruction. However, at  
478 the end of the reconstruction pipeline of the Siemens systems we adopted a different  
479 coil combination approach based on Roemer et al. (1990) and Walsh et al. (2000), to  
480 match the SENSE approach implemented on Philips scanners (Pruessmann et al., 1999;  
481 Robinson et al., 2017). This was required due to artifacts appearing on phase images in  
482 Siemens data reconstructed with the vendor's pipeline, such as open-ended fringe  
483 lines or singularities (Chavez et al., 2002) (Figure 1, Supplementary Material 2). These  
484 reduce the consistency of the QSM results (Santin et al., 2017). However, other coil  
485 combination methods such as a selective channel combination approach (Vegh et al.,  
486 2016) or the COMPOSER (COMbining Phase data using a Short Echo-time Reference  
487 scan) method (Bollmann et al., 2018) have also been shown to reduce open-ended  
488 fringe lines and noise in the signal phase. For future investigations, the raw k-space  
489 data collected from all sites in this study has been stored and is available from the  
490 authors upon request.

491

492 On the QSM reconstruction, an imperfect background field filtering can influence the  
493 reproducibility of QSM data. For this reason, we performed background removal in

494 two steps as implemented in QSMbox v2.0 and as described in (Acosta-Cabronero et  
 495 al., 2018): first with the LBV approach and then followed by the vSMV method.  
 496 Regularized field-to-susceptibility inversion strategies have been proposed to  
 497 overcome the ill-posed problem in QSM with data acquired at a single head orientation  
 498 (de Rochefort et al., 2010). We opted to use the MSDI implementation in QSMbox v2.0  
 499 (Acosta-Cabronero et al., 2018), as it ranked top-10 in all metrics of the 2016 QSM  
 500 Reconstruction Challenge (Langkammer et al., 2018), and also now includes a new self-  
 501 optimized local scale, which results in a better preservation of phase noise texture and  
 502 low susceptibility contrast features. On the second step, the regularization factor,  $\lambda$ ,  
 503 used for this study was set to  $10^{2.7}$ , as recommended by Acosta-Cabronero et al. (2018)  
 504 based on an L-curve analysis (Hansen et al., 1993) with high-resolution 7T data.  
 505

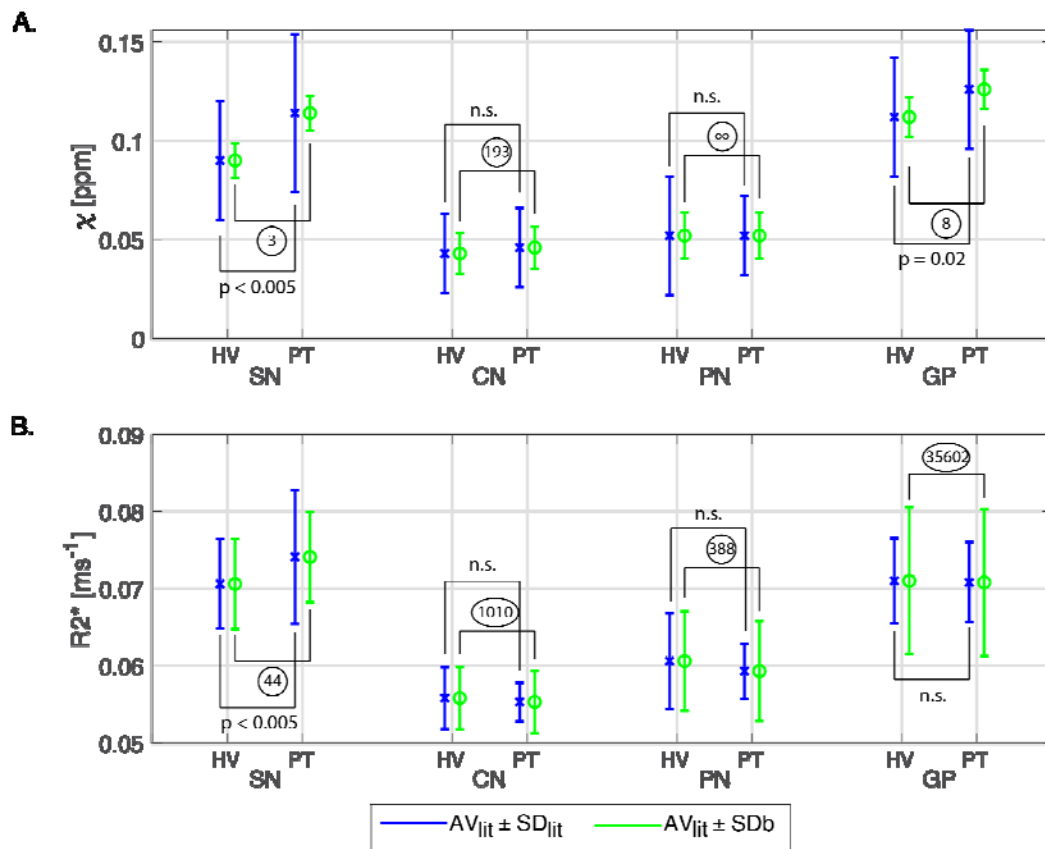

506  
 507 **Figure 7.** Illustration of the feasibility of a 7T QSM clinical study.  $\chi$  (A) and  $R_2^*$  (B) for  
 508 four ROIs (Substantia Nigra, SN; Caudate Nucleus, CN; Putamen, Pu; Globus Pallidus,  
 509 GP) from healthy volunteer (HV) and synthetic “patient” (PT) data for which  $AV_{lit}$  and  
 510  $SD_{lit}$  were obtained from Langkammer et al. (2016) and  $SD_b$  were calculated from data  
 511 of the current study.  $AV_{lit}$  values for  $R_2^*$  were linearly scaled to 7T according to Yao et  
 512 al. (2007). Blue bars show the  $AV_{lit} \pm SD_{lit}$  and green bars the  $AV_{lit} \pm SD_b$ . Statistical

513 differences between HV and PT obtained from Langkammer et al. (2016) are also  
514 shown. For each ROI, the sample size that would have been needed to give a  
515 significant effect was calculated from the group means,  $AV_{lit}$ , and the  $SD_b$  per ROI and  
516 is shown in circles.

517

518 To minimise confounding effects of age or pathology, we assessed test-retest reliability  
519 and cross-site variability with ten healthy young subjects. The cross-site, between-  
520 subject standard-deviation,  $SD_b$ , measured in this study was evaluated together with  
521 healthy and Parkinson's disease data from (Langkammer et al., 2016). A power analysis  
522 revealed a sample size that would have been required for a multi-site clinical study in  
523 each ROI as shown in Figure 7. For all the significant ROIs the number of subjects that  
524 would have been required per group was less or equal to 44. Since this is lower than  
525 the sample size we have used in this study (90 healthy volunteer scans) and the  
526 numbers in the Langkammer study (66 patients and 58 control subjects), it gives strong  
527 confidence of feasibility for future 7T QSM clinical studies.

528

## 529 5. Conclusion

530 We investigated test-retest reliability and reproducibility of  $T_2^*$ -weighted imaging  
531 protocols at ultra-high field MRI. Considering the increase in susceptibility effects at  
532 7T, we found that variability of measurements of QSM  $\chi$  and  $R_2^*$  in the basal ganglia  
533 are reduced compared to reports from lower field strengths, 1.5T and 3T. Scanner  
534 hardware differences give more modest improvements for cortical measurements of  
535 QSM  $\chi$  and  $R_2^*$ . Multi-echo protocols do not benefit from long echo times as these  
536 increase the imprecision in the estimation of QSM. We suggest that 7T MRI is suitable  
537 for multicentre quantitative analyses of brain iron, in health and disease.

## 538 6. Acknowledgements

539 The UK7T Network and this work was funded by the UK's Medical Research Council  
540 (MRC) [MR/N008537/1]. We thank Julio Acosta-Cabronero for making the QSMbox  
541 publically available.

542

## 543 7. Centre funding

544 The Wellcome Centre for Integrative Neuroimaging is supported by core funding from  
545 the Wellcome Trust (203139/Z/16/Z).

546 Cardiff University Brain Research Imaging Centre is supported by the UK Medical  
547 Research Council (MR/M008932/1) and the Wellcome Trust (WT104943).

548 This research was co-funded by the NIHR Cambridge Biomedical Research Centre. The  
549 views expressed are those of the author(s) and not necessarily those of the NHS, the  
550 NIHR or the Department of Health and Social Care. The Cambridge 7T MRI facility is co-  
551 funded by the University of Cambridge and the Medical Research Council  
552 (MR/M008983/1).

553

## 554 8. Individual funding

555 CTR is funded by a Sir Henry Dale Fellowship from the Wellcome Trust and the Royal  
556 Society [098436/Z/12/B]. JBR is supported by the Wellcome Trust (WT103838).

557

## 558 9. References

559 Abdul-Rahman, H., Gdeisat, M., Burton, D., Michael, L., 2005. Fast three-dimensional phase-  
560 unwrapping algorithm based on sorting by reliability following a non-continuous path. *App.*  
561 *Optic.* 46, 6623-6635. <https://doi.org/10.1117/12.611415>

562 Acosta-Cabronero, J., Milovic, C., Mattern, H., Tejos, C., Speck, O., Callaghan, M.F., 2018. A  
563 robust multi-scale approach to quantitative susceptibility mapping. *NeuroImage* 183, 7-24.  
564 <https://doi.org/10.1016/j.neuroimage.2018.07.065>

565 Acosta-Cabronero, J., Betts, M.J., Cardenas-Blanco, A., Yang, S., Nestor, P.J., 2016. In Vivo MRI  
566 mapping of brain iron deposition across the adult lifespan. *J. Neurosci.* 36, 364–374.  
567 <https://doi.org/10.1523/JNEUROSCI.1907-15.2016>

568 Acosta-Cabronero, J., Williams, G.B., Cardenas-Blanco, A., Arnold, R.J., Lupson, V., Nestor, P.J.,  
569 2013. In vivo quantitative susceptibility mapping (QSM) in Alzheimer's disease. *PLoS One* 8,  
570 e81093. <https://doi.org/10.1371/journal.pone.0081093>

571 Barbosa, J.H.O., Santos, A.C., Salmon, C.E.G., 2015. Susceptibility weighted imaging:  
572 differentiating between calcification and hemosiderin. *Radiologia brasileira* 48(2), 93-100.  
573 <https://doi.org/10.1590/0100-3984.2014.0010>

574 Betts, M.J., Acosta-Cabronero, J., Cardenas-Blanco, A., Nestor, P.J. and Düzel, E., 2016. High-  
575 resolution characterisation of the aging brain using simultaneous quantitative susceptibility

- 576 mapping (QSM) and R2\* measurements at 7 T. *Neuroimage* 138, pp.43-63.  
577 <https://doi.org/10.1016/j.neuroimage.2016.05.024>
- 578 Bilgic, B., Pfefferbaum, A., Rohlfing, T., Sullivan, E.V., Adalsteinsson, E., 2012. MRI estimates of  
579 brain iron concentration in normal aging using quantitative susceptibility  
580 mapping. *Neuroimage* 59(3), 2625-2635. <https://doi.org/10.1016/j.neuroimage.2011.08.077>
- 581 Blazejewska, A.I., Al-Radaideh, A.M., Wharton, S., Lim, S.Y., Bowtell, R.W., Constantinescu, C.S.,  
582 Gowland, P.A., 2015. Increase in the iron content of the substantia nigra and red nucleus in  
583 multiple sclerosis and clinically isolated syndrome: a 7 Tesla MRI study. *J. Magn. Reson.*  
584 *Imaging* 41, 1065-1070. <https://doi.org/10.1002/jmri.24644>
- 585 Bollmann, S., Robinson, S.D., O'Brien, K., Vegh, V., Janke, A., Marstaller, L., Reutens, D., Barth,  
586 M., 2018. The challenge of bias-free coil combination for quantitative susceptibility mapping at  
587 ultra-high field. *Magn. Reson. Med.* 79(1), 97-107. <https://doi.org/10.1002/mrm.26644>
- 588 Chavez, S., Xiang, Q., Li, A., 2002. Understanding phase maps in MRI: a new cutline phase  
589 unwrapping method. *IEEE Trans Med Imaging* 21, 966-977.  
590 <https://doi.org/10.1109/TMI.2002.803106>
- 591 Cheng, Y.-C.N., Neelavalli, J., Haacke, E.M., 2009. Limitations of calculating field distributions  
592 and magnetic susceptibilities in MRI using a Fourier based method. *Phys. Med. Biol.* 54(5),  
593 1169-1189. <https://doi.org/10.1088/0031-9155/54/5/005>
- 594 Choi, S., Li, X., Harrison, D.M., 2019. The impact of coregistration of gradient recalled echo  
595 images on quantitative susceptibility and R2\* mapping at 7T. *bioRxiv*.  
596 <https://doi.org/10.1101/529891>
- 597 Clarke, W.T., 2018. UK7T Network harmonized neuroimaging protocols.  
598 <https://ora.ox.ac.uk/objects/uuid:55ca977f-62df-4cbf-b300-2dc893e36647>.
- 599 Clarke, W.T., Mougin, O., Driver, I.D., Rua, C., Morgan, A., Asghar, M., Clare, S., Francis, S.,  
600 Wise, R., Rodgers, C.T., Carpenter, T.A., Muir, K., Bowtell, R., 2019. Multi-site harmonization of  
601 7 Tesla MRI neuroimaging protocols. *NeuroImage* 206, 116335.  
602 <https://doi.org/10.1016/j.neuroimage.2019.116335>
- 603 Cobzas, D., Sun, H.F., Walsh, A.J., Lebel, R.M., Blevins, G., Wilman, A.H., 2015. Subcortical gray  
604 matter segmentation and voxel-based analysis using transverse relaxation and quantitative  
605 susceptibility mapping with application to multiple sclerosis. *J. Magn. Reson. Imaging* 42(6),  
606 1601-1610. <https://doi.org/10.1002/jmri.24951>
- 607 Collins, D.L., Zijdenbos, A.P., Paus, T., Evans, A.C., 2003. Use of registration for cohort studies.  
608 *Medical image registration*.
- 609 de Rochefort, L., Liu, T., Kressler, B., Liu, J., Spincemaille, P., Lebon, V., Wu, J., Wang, Y., 2010.  
610 Quantitative susceptibility map reconstruction from MR phase data using Bayesian  
611 regularization: validation and application to brain imaging. *Magn. Reson. Med.* 63, 194-206.  
612 <https://doi.org/10.1002/mrm.22187>
- 613 Deh, K., Nguyen, T.D., Eskreis-Winkler, S., Prince, M.R., Spincemaille, P., Gauthier, S.,  
614 Kovanlikaya, I., Zhang, Y., Wang, Y., 2015. Reproducibility of quantitative susceptibility  
615 mapping in the brain at two field strengths from two vendors. *J. Magn. Reson. Imaging* 42,  
616 1592-1600. <https://doi.org/10.1002/jmri.24943>

- 617 Deistung, A., Schäfer, A., Schweser, F., Biedermann, U., Güllmar, D., Trampel, R., Turner, R.,  
618 Reichenbach, J.R., 2013. High-resolution MR imaging of the human brainstem in vivo at 7  
619 Tesla. *Frontiers in human neuroscience* 7, 710. <https://doi.org/10.3389/fnhum.2013.00710>
- 620 Duyn, J.H., van Gelderen, P., Li, T.Q., de Zwart, J.A., Koretsky, A.P. and Fukunaga, M., 2007.  
621 High-field MRI of brain cortical substructure based on signal phase. *Proceedings of the*  
622 *National Academy of Sciences*, 104(28), pp.11796-11801.  
623 <https://doi.org/10.1073/pnas.0610821104>
- 624 Ehses, P., Brenner, D., Stirnberg, R., Pracht, E.D., Stöcker, T., 2019. Whole-brain B1-mapping  
625 using three-dimensional DREAM. *Magn. Reson. Med.* 82(3), 924-934.  
626 <https://doi.org/10.1002/mrm.27773>
- 627 Eskreis-Winkler, S., Zhang, Y., Zhang, J., Liu, Z., Dimov, A., Gupta, A. and Wang, Y., 2017. The  
628 clinical utility of QSM: disease diagnosis, medical management, and surgical planning. *NMR in*  
629 *Biomedicine* 30(4), p.e3668. <https://doi.org/10.1002/nbm.3668>
- 630 Feng, X., Deistung, A., Reichenbach, J.R., 2018. Quantitative susceptibility mapping (QSM) and  
631 R2\* in the human brain at 3 T: Evaluation of intra-scanner repeatability. *Z. Med. Phys.* 28, 36–  
632 48. <https://doi.org/10.1016/j.zemedi.2017.05.003>
- 633 Gelman, N., Gorell, J.M., Barker, P.B., Savage, R.M., Spickler, E.M., Windham, J.P., Knight, R.A.,  
634 1999. MR imaging of human brain at 3.0 T: preliminary report on transverse re-laxation rates  
635 and relation to estimated iron content. *Radiology* 210, 759–767.  
636 <https://doi.org/10.1148/radiology.210.3.r99fe41759>
- 637 Haacke, E.M., Cheng, N., House, M.J., Liu, Q., Neelavalli, J., Ogg, R.J., Khan, A., Ayaz, M., Kirsch,  
638 W., Obenaus, A., 2005. Imaging iron stores in the brain using magnetic resonance imaging.  
639 *Magn. Reson. Imag.* 23, 1-25. <https://doi.org/10.1016/j.mri.2004.10.001>
- 640 Hansen, P.C., O’Leary, D.P., 1993. The use of the l-curve in the regularization of discrete ill-  
641 posed problems. *SIAM J Sci Comput* 14(6), 1487-1503. <https://doi.org/10.1137/0914086>
- 642 He, X., Yablonskiy, D.A., 2009. Biophysical mechanisms of phase contrast in gradient echo MRI.  
643 *Proc. Natl. Acad. Sci. U.S.A.* 106, 13558–13563. <https://doi.org/10.1073/pnas.0904899106>
- 644 Hinoda, T., Fushimi, Y., Okada, T., Fujimoto, K., Liu, C., Yamamoto, A., Okada, T., Kido, A.,  
645 Togashi, K., 2015. Quantitative susceptibility mapping at 3 T and 1.5 T: evaluation of  
646 consistency and reproducibility. *Invest. Radiol.* 50, 522-530.  
647 <https://doi.org/10.1097/RLI.000000000000159>
- 648 House, M.J., Pierre, T.G.S., Kowdley, K.V., Montine, T., Connor, J., Beard, J., Berger, J., Siddaiah,  
649 N., Shankland, E., Jin, L.W., 2007. Correlation of proton transverse relaxation rates (R2) with  
650 iron concentrations in postmortem brain tissue from Alzheimer’s disease patients. *Magn.*  
651 *Reson. Med.* 57, 172–180. <https://doi.org/10.1002/mrm.21118>
- 652 Keuken, M.C., Bazin, P.L., Backhouse, K., Beekhuizen, S., Himmer, L., Kandola, A., Lafeber, J.J.,  
653 Prochazkova, L., Trutti, A., Schäfer, A., Turner, R., 2017. Effects of aging on T1, T2\*, and QSM  
654 MRI values in the subcortex. *Brain Structure and Function* 222(6), 2487-2505.  
655 <https://doi.org/10.1007/s00429-016-1352-4>



- 656 Lancione, M., Tosetti, M., Donatelli, G., Cosottini, M., Costagli, M., 2017. The impact of white  
657 matter fiber orientation in single-acquisition quantitative susceptibility mapping. *NMR Biomed.*  
658 30, e3798. <https://doi.org/10.1002/nbm.3798>
- 659 Langkammer, C., Schweser, F., Shmueli, K., Kames, C., Li, X., Guo, L., Milovic, C., Kim, J., Wei, H.,  
660 Bredies, K., Buch, S., 2018. Quantitative susceptibility mapping: report from the 2016  
661 reconstruction challenge. *Magn. Reson. Med.* 79(3), 1661-73.  
662 <https://doi.org/10.1002/mrm.26830>
- 663 Langkammer, C., Pirpamer, L., Seiler, S., Deistung, A., Schweser, F., Franthal, S., Homayoon, N.,  
664 Katschnig-Winter, P., Koegl-Wallner, M., Pendl, T., Stoegerer, E.M., 2016. Quantitative  
665 susceptibility mapping in Parkinson's disease. *PLoS One*, 11(9), e0162460.  
666 <https://doi.org/10.1371/journal.pone.0162460>
- 667 Langkammer, C., Schweser, F., Krebs, N., Deistung, A., Goessler, W., Scheurer, E., Sommer, K.,  
668 Reishofer, G., Yen, K., Fazekas, F., Ropele, S., Reichenbach, J.R., 2012. Quantitative  
669 susceptibility mapping (QSM) as a means to measure brain iron? A post mortem validation  
670 study. *Neuroimage* 62(3), 1593–1599. <https://doi.org/10.1016/j.neuroimage.2012.05.049>
- 671 Langkammer, C., Krebs, N., Goessler, W., Scheurer, E., Ebner, F., Yen, K., Fazekas, F., Ropele, S.,  
672 2010. Quantitative MR imaging of brain iron: a postmortem validation study. *Radiology* 257(2),  
673 455-462. <https://doi.org/10.1148/radiol.10100495>
- 674 Lee, J., Shmueli, K., Kang, B.T., Yao, B., Fukunaga, M., van Gelderen, P., Palumbo, S., Bosetti, F.,  
675 Silva, A.C., Duyn, J.H., 2012. The contribution of myelin to magnetic susceptibility-weighted  
676 contrasts in high-field MRI of the brain. *Neuroimage* 59, 3967–3975.  
677 <https://doi.org/10.1016/j.neuroimage.2011.10.076>
- 678 Li, G., Zhai, G., Zhao, X., An, H., Spincemille, P., Gillen, K.M., Ku, Y., Wang, Y., Huang, D., Li, J.,  
679 2019. 3D texture analysis within substantia nigra of Parkinson's disease patients on  
680 quantitative susceptibility maps and R2\* maps. *NeuroImage* 188, 465-472.  
681 <https://doi.org/10.1016/j.neuroimage.2018.12.041>
- 682 Li, L., Leigh, J.S., 2004. Quantifying arbitrary magnetic susceptibility distributions with MR.  
683 *Magn. Reson. Med.* 51, 1077–1082. <https://doi.org/10.1002/mrm.20054>
- 684 Li, W., Liu, C., Duong, T.Q., van Zijl, P.C., Li, X., 2017. Susceptibility tensor imaging (STI) of the  
685 brain. *NMR Biomed.* 30(4), p.e3540. <https://doi.org/10.1002/nbm.3540>
- 686 Lin, P.Y., Chao, T.C., Wu, M.L., 2015. Quantitative susceptibility mapping of human brain at 3T:  
687 a multisite reproducibility study. *AJNR Am J. Neuroradiol.* 36, 467-474.  
688 <https://doi.org/10.3174/ajnr.A4137>
- 689 Lotfipour, A.K., Wharton, S., Schwarz, S.T., Gontu, V., Schaefer, A., Peters, A.M., Bowtell, R.W.,  
690 Auer, D.P., Gowland, P.A., Bajaj, P.S., 2012. High resolution magnetic susceptibility mapping of  
691 the substantia nigra in Parkinson's disease. *J. Magn. Reson. Imag.* 35, 48-55.  
692 <https://doi.org/10.1002/jmri.22752>
- 693 Mougín, O., Clarke, W., Driver, I., Rua, C., Morgan, A.T., Francis, S., Muir, K., Carpenter, A.,  
694 Rodgers, C., Wise, R., Porter, D., Clare, S., Bowtell, R., 2019. Robustness of PSIR segmentation  
695 and R1 mapping at 7T: a travelling head study. *Proc. Intr. Soc. Mag. Reson. Med.* 27, 237.

- 696 Nehrke, K., Bornert, P., 2012. DREAM--a novel approach for robust, ultrafast, multislice B(1)  
697 mapping. *Magn. Reson. Med.* 68(5), 1517-1526. <https://doi.org/10.1002/mrm.24158>
- 698 Pei, M., Nguyen, T.D., Thimmappa, N.D., Salustri, C., Dong, F., Cooper, M.A., Li, J., Prince, M.R.,  
699 Wang, Y., 2015. Algorithm for fast monoexponential fitting based on auto-regression on linear  
700 operations (ARLO) of data. *Magn. Reson. Med.* 73, 843-850.  
701 <https://doi.org/10.1002/mrm.25137>
- 702 Pruessmann, K.P., Weiger, M., Scheidegger, M.B., Boesiger, P., 1999. SENSE: sensitivity  
703 encoding for fast MRI. *Magn. Reson. Med.* 42(5), 952-962. [https://doi.org/10.1002/\(SICI\)1522-2594\(199911\)42:5<952::AID-MRM16>3.0.CO;2-S](https://doi.org/10.1002/(SICI)1522-2594(199911)42:5<952::AID-MRM16>3.0.CO;2-S)
- 705 R Core team, 2013. R: A language and environment for statistical computing. R Foundation for  
706 Statistical Computing, Vienna, Austria. <http://www.R-project.org/>.
- 707 Reichenbach, J.R., 2012. The future of susceptibility contrast for assessment of anatomy and  
708 function. *Neuroimage* 62, 1311-1315. <https://doi.org/10.1016/j.neuroimage.2012.01.004>
- 709 Reichenbach, J.R., Jonetz-Mentzel, L., Fitzek, C., Haacke, E.M., Kido, D.K., Lee, B.C., Kaiser,  
710 W.A., 2001. High-resolution blood oxygen-level dependent MR venography (HRBV): a new  
711 technique. *Neuroradiology* 43, 364-369. <https://doi.org/10.1007/s002340000503>
- 712 Robinson, S.D., Bredies, K., Khabiova, D., Dymerska, B., Marques, J.P., Schweser, F., 2017. An  
713 illustrated comparison of processing methods for MR phase imaging and QSM: combining  
714 array coil signals and phase unwrapping. *NMR Biomed.* 30, e3601.  
715 <https://doi.org/10.1002/nbm.3601>
- 716 Roemer, P.B., Edelstein, W.A., Hayes, C.E., Souza, S.P., Mueller, O.M., 1990. The NMR phased  
717 array. *Magn. Reson. Med.* 16(2), 192-225. <https://doi.org/10.1002/mrm.1910160203>
- 718 Santin, M.D., Didier, M., Valabregue, R., Yahia Cherif, L., García-Lorenzo, D., Loureiro de Sousa,  
719 P., Bardinet, E., Lehericy, S., 2017. Reproducibility of R2\* and quantitative susceptibility  
720 mapping (QSM) reconstruction methods in the basal ganglia of healthy subjects. *NMR Biomed.*  
721 30(4), e3491. <https://doi.org/10.1002/nbm.3491>
- 722 Schweser, F., Deistung, A., Lehr, B.W., Reichenbach, J.R., 2011. Quantitative imaging of intrinsic  
723 magnetic tissue properties using MRI signal phase: an approach to in vivo brain iron  
724 metabolism?. *Neuroimage* 54(4), 2789-2807.  
725 <https://doi.org/10.1016/j.neuroimage.2010.10.070>
- 726 Smith, S.M., 2002. Fast robust automated brain extraction. *Human Brain Mapping* 17(3), 143-  
727 155. <https://doi.org/10.1002/hbm.10062>
- 728 Snyder A.M., Connor J.R., 2009. Iron, the substantia nigra and related neurological disorders.  
729 *Biochimica et Biophysica Acta* 1790, 606-614. <https://doi.org/10.1016/j.bbagen.2008.08.005>
- 730 Spincemaille, P., Liu, Z., Zhang, S., Kovanlikaya, I., Ippoliti, M., Makowski, M., Watts, R., de  
731 Rochefort, L., Venkatraman, V., Desmond, P. and Santin, M.D., 2019. Clinical integration of  
732 automated processing for brain quantitative susceptibility mapping: multi-site reproducibility  
733 and single-site robustness. *Journal of Neuroimaging*, 29(6), pp.689-698.  
734 <https://doi.org/10.1111/jon.12658>

- 735 Straub, S., Schneider, T.M., Emmerich, J., Freitag, M.T., Ziener, C.H., Schlemmer, H.P., Ladd,  
736 M.E., Laun, F.B., 2017. Suitable reference tissues for quantitative susceptibility mapping of the  
737 brain. *Magn. Reson. Med.* 78, 204-214. <https://doi.org/10.1002/mrm.26369>
- 738 Sullivan, E.V., Pfefferbaum, A., Adalsteinsson, E., Swan, G.E., Carmelli, D., 2002. Differential  
739 rates of regional brain change in callosal and ventricular size: a 4-year longitudinal MRI study  
740 of elderly men. *Cereb. Cortex* 12(4), 438-45. <https://doi.org/10.1093/cercor/12.4.438>
- 741 Tie-Qiang, T., Gelderen, P., Merkle, H., Talagala, L., Koretsky, A.P., Duyn, J., 2006. Extensive  
742 heterogeneity in white matter intensity in high-resolution T2\*-weighted MRI of the human  
743 brain at 7.0 T. *NeuroImage* 32, 1032-1040. <https://doi.org/10.1016/j.neuroimage.2006.05.053>
- 744 Vegh, V., O'Brien, K., Barth, M. and Reutens, D.C., 2016. Selective channel combination of MRI  
745 signal phase. *Magn. Reson. Med.* 76(5), 1469-1477. <https://doi.org/10.1002/mrm.26057>
- 746 Walsh, D.O., Gmitro, A.F., Marcellin, M.W., 2000. Adaptive reconstruction of phased array MR  
747 imagery. *Magn. Reson. Med.* 43(5), 682-690. [https://doi.org/10.1002/\(SICI\)1522-  
748 2594\(200005\)43:5<682::AID-MRM10>3.0.CO;2-G](https://doi.org/10.1002/(SICI)1522-2594(200005)43:5<682::AID-MRM10>3.0.CO;2-G)
- 749 Wang, Y., Liu, T., 2015. Quantitative susceptibility mapping (QSM): decoding MRI data for a  
750 tissue magnetic biomarker. *Magn. Reson. Med.* 7, 82-101. <https://doi.org/10.1002/mrm.25358>
- 751 Weir, J. P., 2005. Quantifying test-retest reliability using the intraclass correlation coefficient  
752 and the SEM. *J. Strength Cond. Res.* 19(1), 231-240.
- 753 Wharton, S., Bowtell, R., 2010. Whole-brain susceptibility mapping at high field: a comparison  
754 of multiple-and single-orientation methods. *Neuroimage* 53(2), 515-525.  
755 <https://doi.org/10.1016/j.neuroimage.2010.06.070>
- 756 Yacoub, E., Shmuel, A., Pfeuffer, J., Van de Moortele, P.F., Adriany, G., Andersen, P., Vaughan,  
757 J.T., Merkle, H., Ugurbil, K., Hu, X., 2001. Imaging brain function in humans at 7 Tesla. *Magn.*  
758 *Reson. Med.* 45, 588-594. <https://doi.org/10.1002/mrm.1080>
- 759 Yang, X., Sammet, S., Schmalbrock, P., Knopp, M. V., 2010. Postprocessing correction for  
760 distortions in T2\* decay caused by quadratic cross-slice b0 inhomogeneity. *Magn. Reson. Med.*  
761 63(1): 1258-1268. <https://doi.org/10.1002/mrm.22316>
- 762 Yao, B., Li, T., van Gelderen, P., Shmueli, K., De Zwart, J.A., Duyn, J.H., 2009. Neuro image  
763 susceptibility contrast in high field MRI of human brain as a function of tissue iron content.  
764 *Neuroimage* 44(4), 1259-66. <https://doi.org/10.1016/j.neuroimage.2008.10.029>
- 765 Yao, B., van Gelderen, P., de Zwart, J.A., Duyn, J.H., 2007. Brain iron in MR imaging: R2\* and  
766 phase shift at different field strengths. *Proc. Intr. Soc. Mag. Reson. Med.* 15, 2165.
- 767 Zhou, D., Liu, T., Spincemaille, P., Wang, Y., 2014. Background field removal by solving the  
768 Laplacian boundary value problem. *NMR Biomed.* 27(3), 312-319.  
769 <https://doi.org/10.1002/nbm.3064>
